# Supplementary material for: Post-COVID-19 syndrome among symptomatic COVID-19 patients: A prospective cohort study in a tertiary care center of Bangladesh
Source: PubMed Central journal article supplement (PMC8031743; doi:10.1371/journal.pone.0249644), 2021-04-08
Supplement: pone.0249644.s002.pdf [file pone.0249644.s002.pdf]

### Telephonic interview guide

Post-COVID-19 syndrome among symptomatic COVID-19 patients: A prospective cohort study  
in a tertiary care center of Bangladesh

Name of the patient

Name of the interviewer

Date of interview

| Main focus            | Question                                     | Response | Code                               |
|-----------------------|----------------------------------------------|----------|------------------------------------|
| Greetings             | Assalamualaikum<br>How are you?              |          | Response to be written in sentence |
| Presenting complaints | Do you have fever at present?                |          | Yes -1<br>No-2                     |
|                       | Do you have cough at present?                |          | Yes -1<br>No-2                     |
|                       | Do you have running nose at present?         |          | Yes -1<br>No-2                     |
|                       | Do you have sputum at present?               |          | Yes -1<br>No-2                     |
|                       | Do you have Respiratory distress at present? |          | Yes -1<br>No-2                     |
|                       | Do you have Sore throat at present?          |          | Yes -1<br>No-2                     |
|                       | Do you have hoarseness of voice at present?  |          | Yes -1<br>No-2                     |
|                       | Do you have chest pain at present?           |          | Yes -1<br>No-2                     |
|                       | Do you have Diarrhoea at present?            |          | Yes -1<br>No-2                     |
|                       | Do you have Vomiting at present?             |          | Yes -1<br>No-2                     |
|                       | Do you have Anosmia at present?              |          | Yes -1<br>No-2                     |

|                                                                                                                     |                                                                                                |  |                                    |
|---------------------------------------------------------------------------------------------------------------------|------------------------------------------------------------------------------------------------|--|------------------------------------|
|                                                                                                                     |                                                                                                |  |                                    |
|                                                                                                                     | Do you have Anorexia at present?                                                               |  |                                    |
|                                                                                                                     | Do you have Headache at present?                                                               |  | Yes -1<br>No-2                     |
|                                                                                                                     | Do you have any other complain at present?                                                     |  | Response to be written in sentence |
| Post COVID features<br>Will be asked if patient have clinical recovery (No fever, no cough no respiratory distress) | Have you developed any new complain after recovery?                                            |  | Yes -1<br>No-2                     |
|                                                                                                                     | What are your new complains?                                                                   |  | Response to be written in sentence |
|                                                                                                                     | Have you developed exaggeration of previous chronic disease?                                   |  | Yes -1<br>No-2                     |
|                                                                                                                     | Which of your disease is exaggerated                                                           |  | Response to be written in sentence |
|                                                                                                                     | Do you have any minor persisted COVID symptoms? (except fever, cough and respiratory distress) |  | Yes -1<br>No-2                     |
|                                                                                                                     | Which minor COVID symptoms are persisted?                                                      |  | Response to be written in sentence |
| Physical findings                                                                                                   | What is your Temperature today?                                                                |  | Response to be written in sentence |
|                                                                                                                     | What is your oxygen saturation to day                                                          |  | Response to be written in sentence |
| Concluding remarks                                                                                                  | Do you have anything to add?                                                                   |  | Response to be written in sentence |
|                                                                                                                     | Thank you                                                                                      |  |                                    |

## টেলিফোন সাক্ষাতকার নির্দেশিকা

সাক্ষাতকার প্রদানকারীর নাম:

সাক্ষাতকার গ্রহনকারীর নাম:

তারিখ:

| গধরহ ভড়পুঁং | প্রশ্ন                              | উত্তর | কোড                               |
|--------------|-------------------------------------|-------|-----------------------------------|
| সম্ভাষণ      | আস্‌সালামুআলাইকুম<br>কেমন আছেন?     |       | জবাব লিখিত আকারে<br>লিপিবদ্ধ করুন |
| উপসর্গসমূহ   | আপনার কি এখন জ্বর<br>আছে?           |       | হাঁ -১<br>না-২                    |
|              | আপনার কি এখন কাশি<br>আছে?           |       | হাঁ -১<br>না-২                    |
|              | আপনার কি এখন সর্দি<br>আছে?          |       | হাঁ -১<br>না-২                    |
|              | আপনার কি এখন কফ<br>আছে?             |       | হাঁ -১<br>না-২                    |
|              | আপনার কি এখন<br>শ্বাসকষ্ট আছে?      |       | হাঁ -১<br>না-২                    |
|              | আপনার কি এখন<br>গলাব্যথা আছে?       |       | হাঁ -১<br>না-২                    |
|              | আপনার কি এখন ফ্যাশ<br>ফ্যাশ কঠ আছে? |       | হাঁ -১<br>না-২                    |
|              | আপনার কি এখন বুকে<br>ব্যথা আছে?     |       | হাঁ -১<br>না-২                    |
|              | আপনার কি এখন পাতলা<br>পায়খানা আছে? |       | হাঁ -১<br>না-২                    |

|                                                        |                                                         |  |                                |
|--------------------------------------------------------|---------------------------------------------------------|--|--------------------------------|
|                                                        | আপনার কি এখন বমি আছে?                                   |  | হাঁ -১<br>না-২                 |
|                                                        | আপনার কি এখন গন্ধহীনতা আছে?                             |  | হাঁ -১<br>না-২                 |
|                                                        | আপনার কি এখন অরুচি আছে?                                 |  | হাঁ -১<br>না-২                 |
|                                                        | আপনার কি এখন মাথা ব্যথা আছে?                            |  | হাঁ -১<br>না-২                 |
|                                                        | আপনার আর কোন উপসর্গ আছে?                                |  | জবাব লিখিত আকারে লিপিবদ্ধ করুন |
| কোভিড পরবর্তী উপসর্গ (জ্বর, কাশি ও শ্বাসকষ্ট না থাকলে) | আপনার কি কোন নতুন উপসর্গ দেখা দিয়েছে?                  |  | হাঁ -১<br>না-২                 |
|                                                        | আপনার কি কি নতুন উপসর্গ দেখা দিয়েছে?                   |  | জবাব লিখিত আকারে লিপিবদ্ধ করুন |
|                                                        | আপনার পূর্ববর্তী কোন রোগের উপসর্গ বৃদ্ধি পেয়েছে?       |  | হাঁ -১<br>না-২                 |
|                                                        | আপনার পূর্ববর্তী কোন রোগের কি কি উপসর্গ বৃদ্ধি পেয়েছে? |  | জবাব লিখিত আকারে লিপিবদ্ধ করুন |
|                                                        | আপনার কোভিডের সামান্য উপসর্গ এখনো আছে কি?               |  | হাঁ -১<br>না-২                 |
|                                                        | আপনার কোভিডের সামান্য উপসর্গ কি কি আছে ?                |  | জবাব লিখিত আকারে লিপিবদ্ধ করুন |
| পরীক্ষণ ফলাফল                                          | আজকের তাপমাত্রা কত ?                                    |  | জবাব লিখিত আকারে লিপিবদ্ধ করুন |
|                                                        | আজকের অক্সিজেনের মাত্রা কত?                             |  | জবাব লিখিত আকারে লিপিবদ্ধ করুন |
| বিদায়ী মন্তব্য                                        | আপনার কি আর কিছু বলার আছে?                              |  | জবাব লিখিত আকারে লিপিবদ্ধ করুন |
|                                                        | ধন্যবাদ                                                 |  |                                |
